# Supplementary material for: Advanced cobalt-based hierarchical and gradient armor catalysts for high-performance Li–S batteries over a wide temperature range
Source: Royal Society of Chemistry journal article supplement (doi:10.1039/d4tc02573c), 2024-01-01
Supplement: d4tc02573c1.pdf [file d4tc02573c1.pdf]

## Advanced Cobalt-Based Hierarchical and Gradient Armor Catalysts for High-Performance Li-S Batteries over a Wide Temperature Range

Yiding Li,<sup>a</sup> Siqi Wang,<sup>a</sup> Yujun Fu,<sup>a</sup> Ruohan Li,<sup>a</sup> Han Guo<sup>a</sup>, Chengtian Lv,<sup>a</sup> Xiaoqiang Yin,<sup>b</sup> Zhibo Yang,<sup>b</sup> Dequan Liu,<sup>\*a</sup> and Deyan He<sup>\*a</sup>

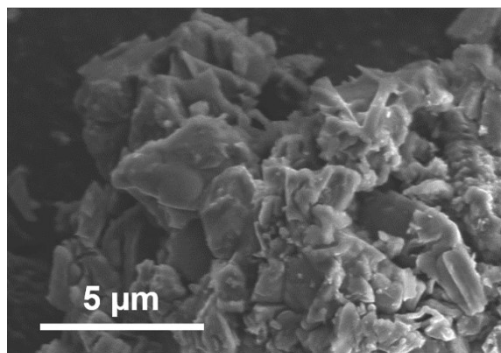

Figure S1. SEM image of the synthesized g-C<sub>3</sub>N<sub>4</sub>.

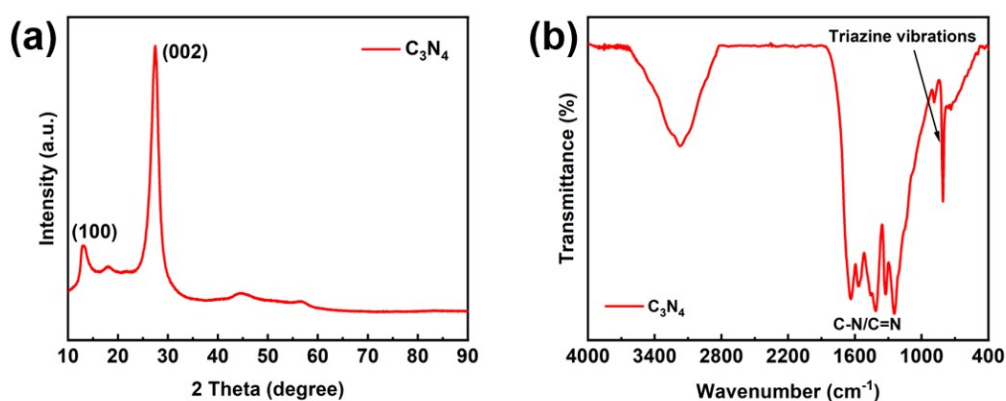

Figure S2. (a) XRD pattern and (b) FTIR spectrum of the synthesized g-C<sub>3</sub>N<sub>4</sub>.

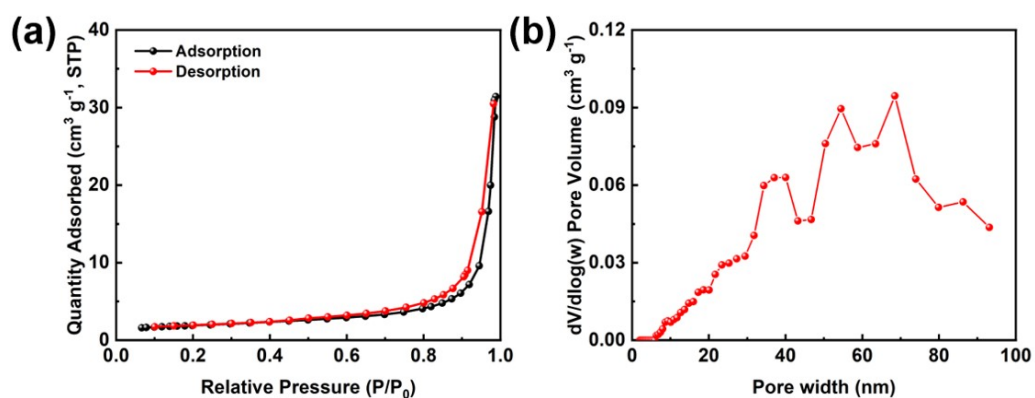

Figure S3. (a) N<sub>2</sub> adsorption-desorption isotherms and (b) pore size distribution of the synthesized g-C<sub>3</sub>N<sub>4</sub>.

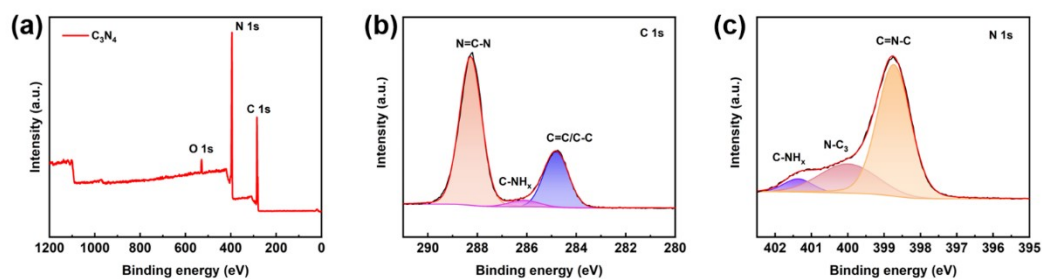

Figure S4. (a) XPS survey scan spectrum, (b) C 1s and (c) N 1s high-resolution XPS spectra of the synthesized  $g\text{-C}_3\text{N}_4$ .

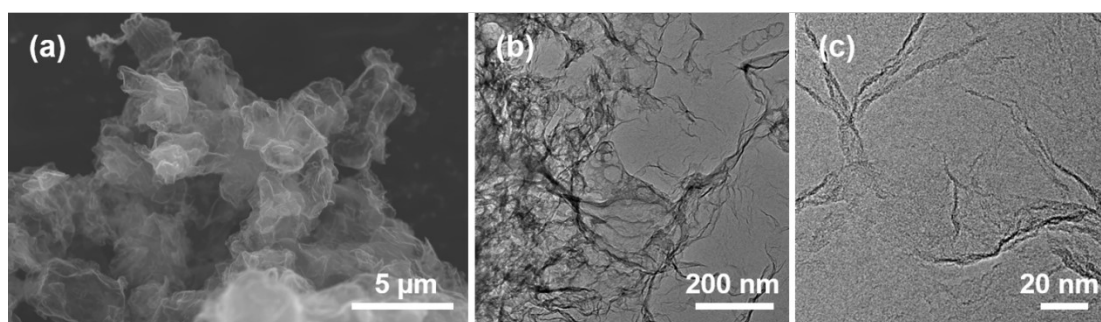

Figure S5. (a) SEM and (b, c) TEM images of the N-doped carbon nanosheets.

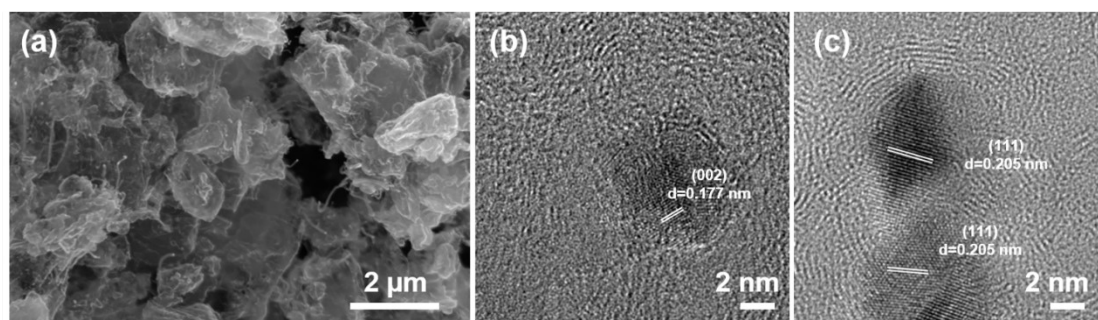

Figure S6. (a) SEM and (b, c) HR-TEM images of  $\text{Co@NCNN-700}$ .

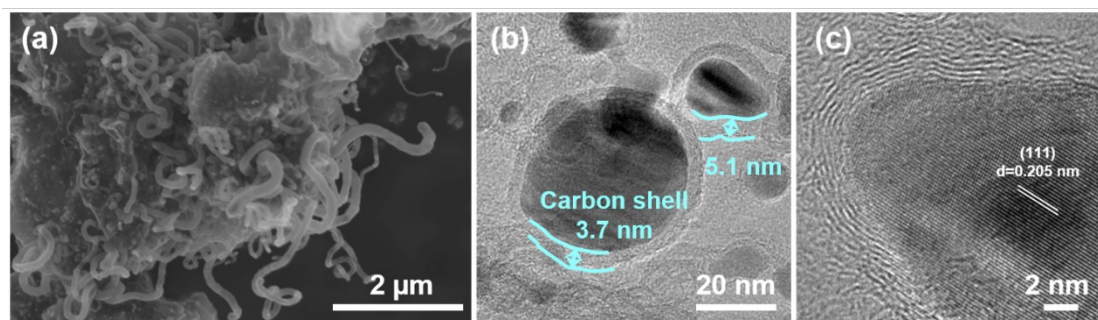

Figure S7. (a) SEM, (b) TEM, and (c) HR-TEM images of  $\text{Co@NCNN-900}$ .

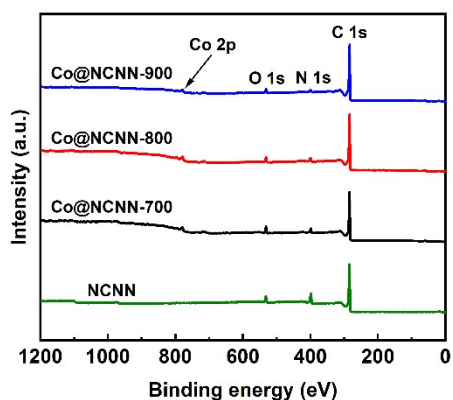

Figure S8. XPS survey scan spectra of the Co@NCNN armor catalysts and NCNN.

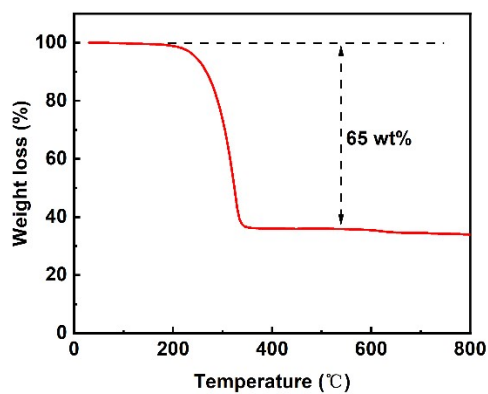

Figure S9. TGA curve of the Co@NCNN-800-S composite in Ar atmosphere.

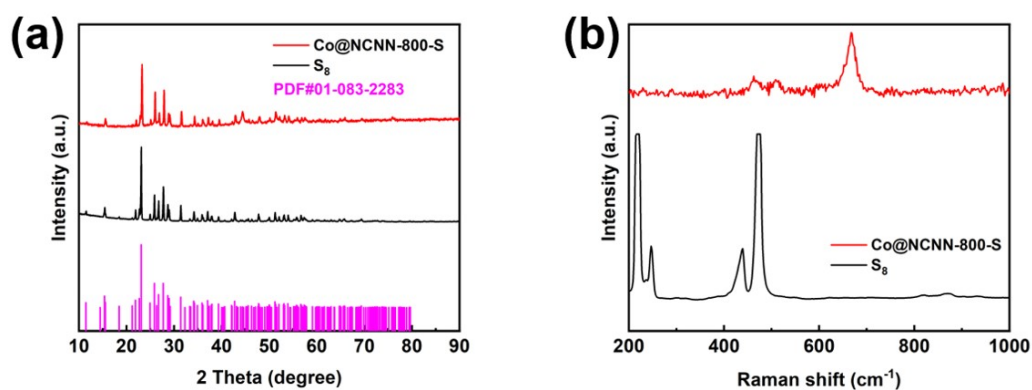

Figure S10. (a) XRD patterns and (b) Raman spectra of Co@NCNN-800-S composite and S<sub>8</sub>.

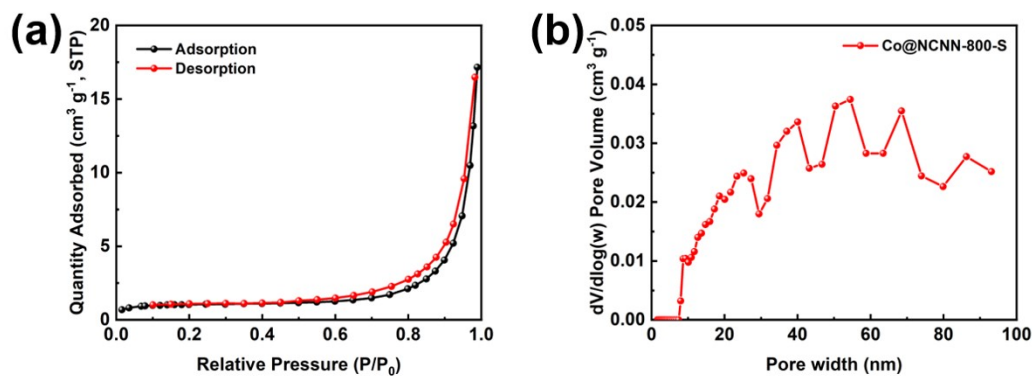

Figure S11. (a) N<sub>2</sub> adsorption-desorption isotherms and (b) pore size distribution of Co@NCNN-800-S composite.

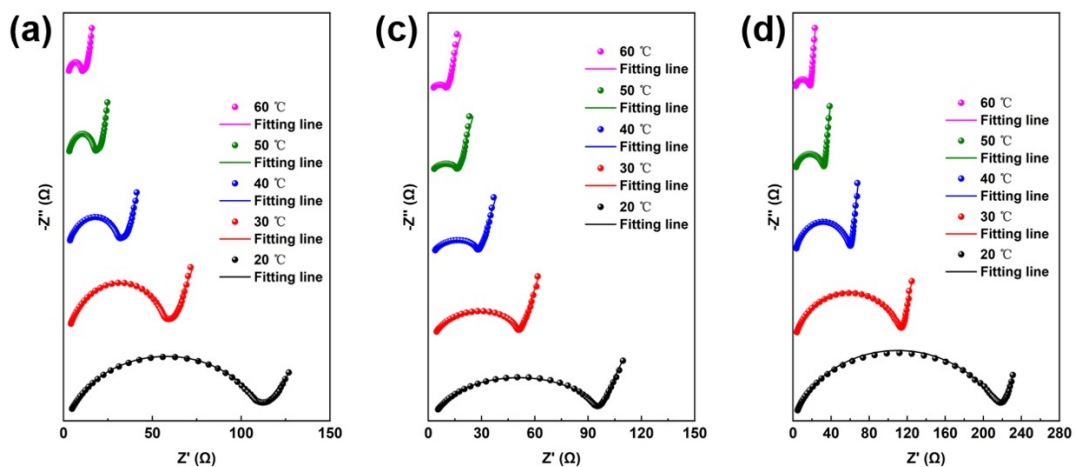

Figure S12. EIS plots of (a) Co@NCNN-700-S, (b) Co@NCNN-900-S, and (c) NCNN-S cathodes at different temperatures and open circuit voltages

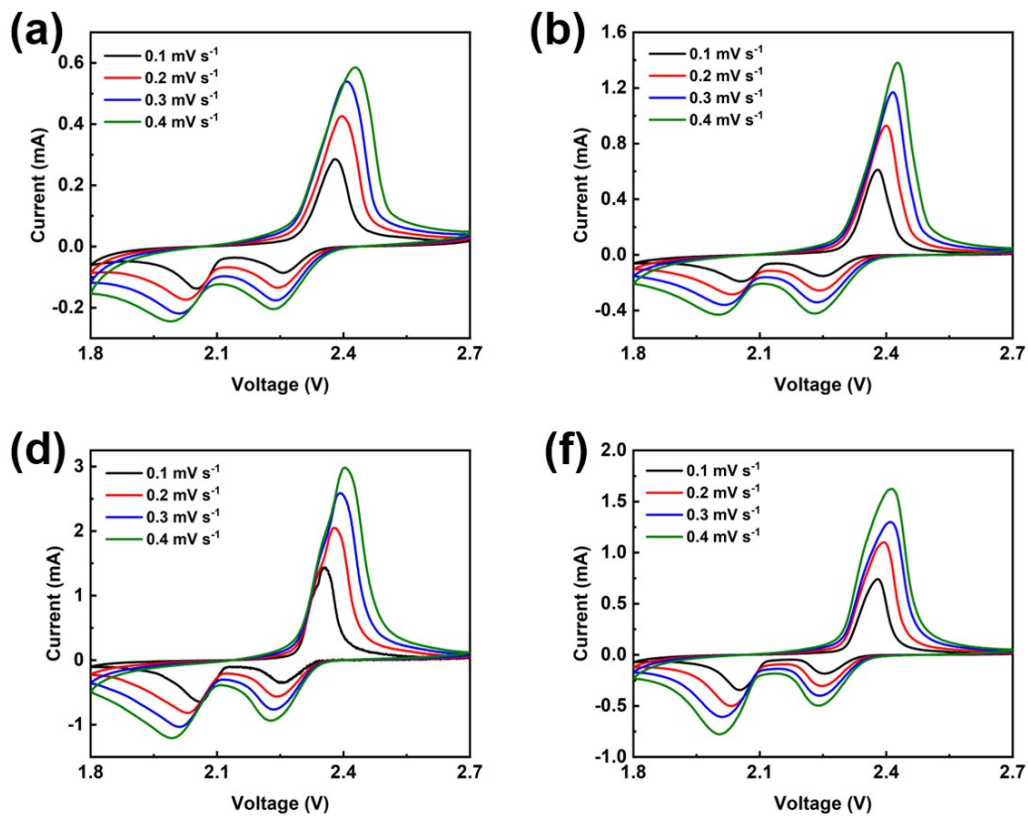

Figure S13. CV curves of Li-S cells with (a) NCNN-S, (b) Co@NCNN-700-S, (c) Co@NCNN-800-S, and (d) Co@NCNN-900-S cathodes at different scan rates from 0.1 to 0.4 mV s<sup>-1</sup>.

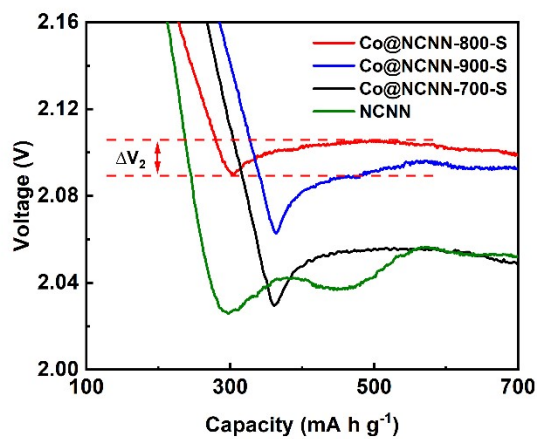

Figure S14. Enlarged view of the charge and discharge profiles in Figure 6c.

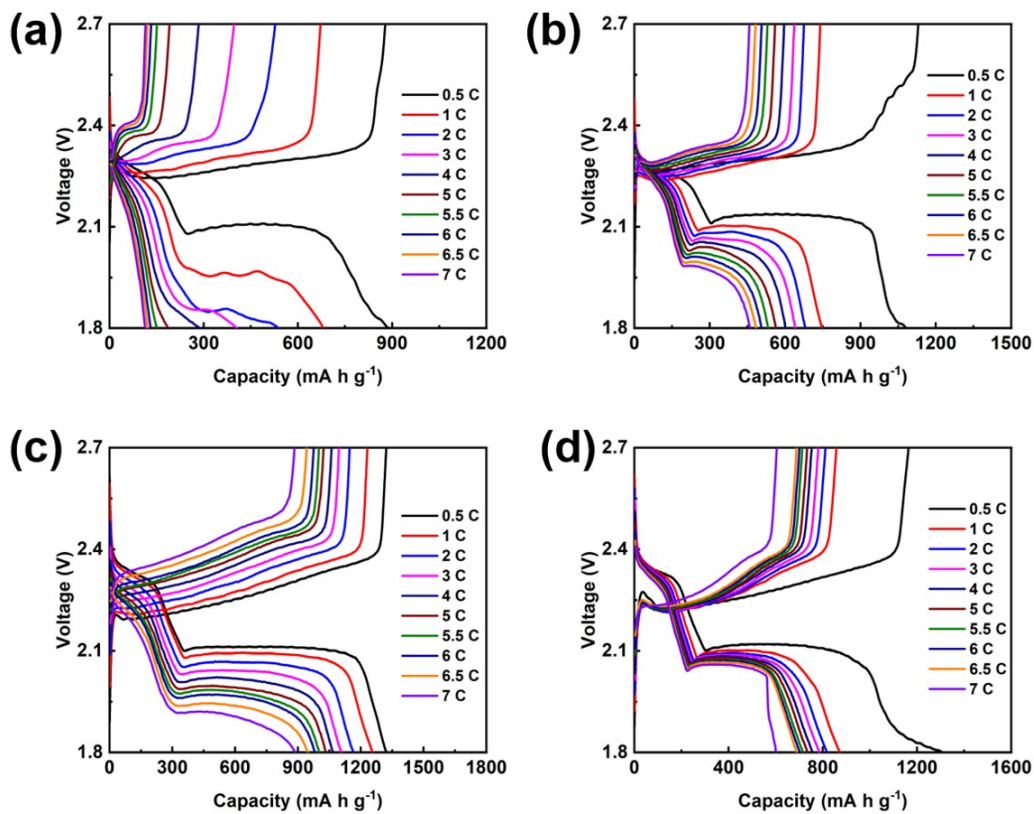

Figure S15. Galvanostatic charge-discharge profiles of Li-S cells with (a) NCNN-S, (b) Co@NCNN-700-S, (c) Co@NCNN-800-S, and (d) Co@NCNN-900-S cathodes at different current densities.

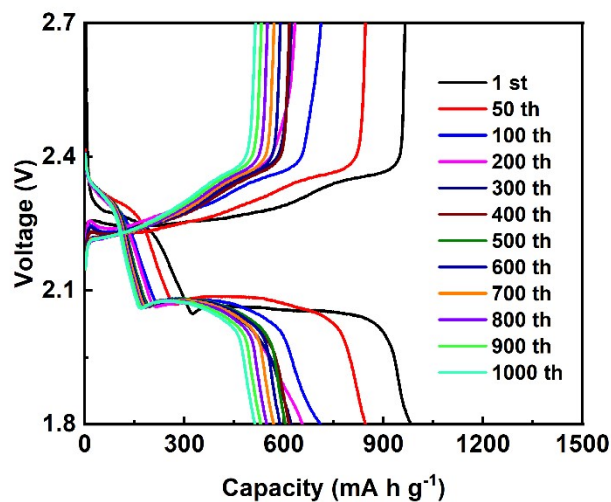

Figure S16. Galvanostatic charge-discharge profiles of Li-S cells with Co@NCNN-800-S electrodes at different cycles under 7 C.

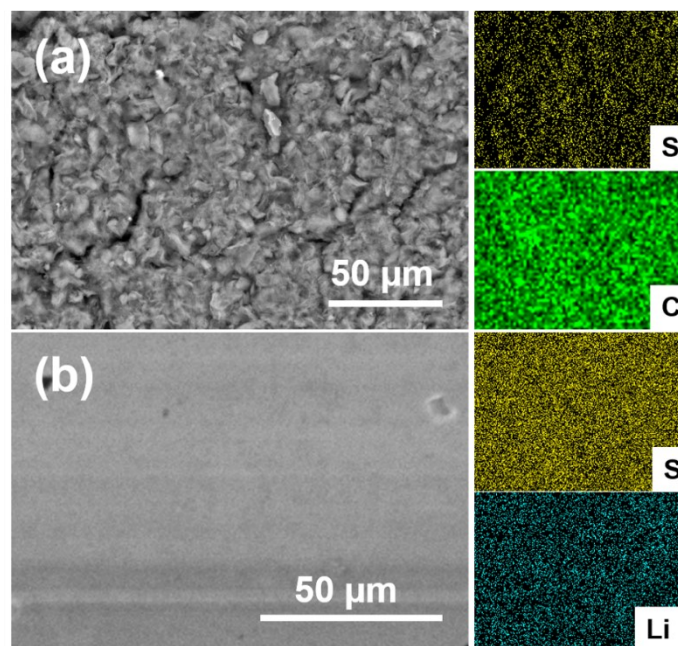

Figure S17. SEM and corresponding element distribution of (a) cathode and (b) lithium anode after cycling.

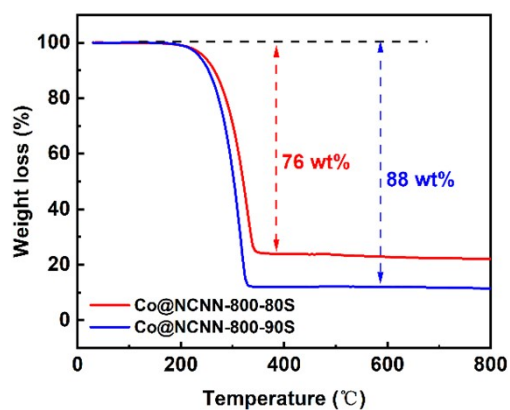

Figure S18. TGA curves of Co@NCNN-800-80S and Co@NCNN-800-90S composites under Ar atmosphere.

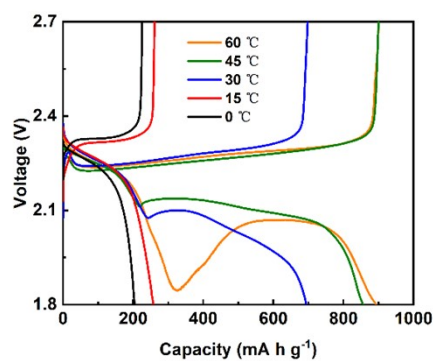

Figure S19. Galvanostatic charge-discharge profiles of the Li-S cell with the NCNN-800-S cathode

at different temperatures.

Table S1. N<sub>2</sub> adsorption-desorption analyses of different samples.

| Samples                         | BET surface area (m <sup>2</sup> g <sup>-1</sup> ) | Pore volume (cm <sup>3</sup> g <sup>-1</sup> ) |
|---------------------------------|----------------------------------------------------|------------------------------------------------|
| Co@NCNN-900                     | 348.56                                             | 1.094                                          |
| Co@NCNN-800                     | 362.65                                             | 0.809                                          |
| Co@NCNN-700                     | 140.57                                             | 0.419                                          |
| NCNN                            | 113.74                                             | 0.297                                          |
| g-C <sub>3</sub> N <sub>4</sub> | 6.49                                               | 0.0048                                         |
| Co@NCNN-800-S                   | 3.25                                               | 0.026                                          |

Table S2. Element content in the samples derived from fitting XPS peaks.

| Samples     | N      | O     |
|-------------|--------|-------|
| Co@NCNN-900 | 3.46%  | 2.82% |
| Co@NCNN-800 | 4.60%  | 3.24% |
| Co@NCNN-700 | 6.67%  | 4.91% |
| NCNN        | 12.28% | 4.02% |

Table S3. Functional group contents of different samples derived from fitting the XPS peak of C 1s.

|             | C-C   | C-N   | C=O   |
|-------------|-------|-------|-------|
| Co@NCNN-900 | 55.5% | 36.2% | 8.3%  |
| Co@NCNN-800 | 53.8% | 36.8% | 9.4%  |
| Co@NCNN-700 | 52.9% | 35.1% | 12.0% |
| NCNN        | 57.6% | 33.4% | 9.0%  |



Table S4. Functional group contents of different samples derived from fitting the XPS peak of N 1s.

| Samples     | Graphitic N | Pyridinic N |
|-------------|-------------|-------------|
| Co@NCNN-900 | 61.9%       | 38.1%       |
| Co@NCNN-800 | 53.1%       | 46.9%       |
| Co@NCNN-700 | 47.1%       | 52.9%       |
| NCNN        | 48.9%       | 51.1%       |

Table S5. Electrochemical impedance of Li-S batteries with different cathodes at different temperatures and open circuit voltages.

|       | Co@NCNN-700-S      |                       | Co@NCNN-800-S      |                       | Co@NCNN-900-S      |                       | NCNN-S             |                       |
|-------|--------------------|-----------------------|--------------------|-----------------------|--------------------|-----------------------|--------------------|-----------------------|
|       | $R_s$ ( $\Omega$ ) | $R_{ct}$ ( $\Omega$ ) | $R_s$ ( $\Omega$ ) | $R_{ct}$ ( $\Omega$ ) | $R_s$ ( $\Omega$ ) | $R_{ct}$ ( $\Omega$ ) | $R_s$ ( $\Omega$ ) | $R_{ct}$ ( $\Omega$ ) |
| 20 °C | 4.77               | 107.31                | 5.11               | 56.30                 | 5.54               | 91.30                 | 4.80               | 211.41                |
| 30 °C | 4.16               | 56.08                 | 4.20               | 29.78                 | 4.68               | 47.59                 | 4.14               | 110.32                |
| 40 °C | 3.67               | 29.80                 | 3.53               | 15.92                 | 3.94               | 25.08                 | 3.63               | 57.42                 |
| 50 °C | 3.31               | 16.27                 | 3.11               | 8.74                  | 3.36               | 13.66                 | 3.25               | 30.00                 |
| 60 °C | 3.02               | 8.88                  | 2.79               | 4.91                  | 2.99               | 7.62                  | 2.95               | 15.72                 |

Table S6.  $D_{Li^+}$  of various samples derived from the Randles-Sevcik equation.

| Samples       | $D_{Li^+}$ (Peak A)    | $D_{Li^+}$ (Peak B)    | $D_{Li^+}$ (Peak C)   |
|---------------|------------------------|------------------------|-----------------------|
| NCNN          | $1.97 \times 10^{-10}$ | $1.68 \times 10^{-10}$ | $1.29 \times 10^{-9}$ |
| Co@NCNN-700-S | $9.71 \times 10^{-10}$ | $7.82 \times 10^{-10}$ | $8.08 \times 10^{-9}$ |
| Co@NCNN-800-S | $4.64 \times 10^{-9}$  | $4.46 \times 10^{-9}$  | $3.30 \times 10^{-8}$ |
| Co@NCNN-900-S | $1.29 \times 10^{-9}$  | $2.36 \times 10^{-9}$  | $9.82 \times 10^{-9}$ |

Table S7. Comparison of the performance of Co@NCNN with other Co-based catalysts reported in the literature.

| Samples                              | Sulfur loading (mg cm <sup>-2</sup> ) | Highest capacity (mA h g <sup>-1</sup> ) | Highest areal capacity (mA h cm <sup>-2</sup> ) | Current density | Capacity decay per cycle & Cycles | Reference                                |
|--------------------------------------|---------------------------------------|------------------------------------------|-------------------------------------------------|-----------------|-----------------------------------|------------------------------------------|
| Co@NCN<br>N                          | 1.5                                   | 1417.7                                   |                                                 | 0.5 C           | 0.11%, 100 cycles                 | This work                                |
|                                      |                                       | 983.9                                    |                                                 | 7 C             | 0.048%, 1000 cycles               |                                          |
|                                      | 3.6                                   |                                          | 3.43                                            | 1 C             |                                   |                                          |
|                                      | 6.1                                   |                                          | 5.05                                            |                 |                                   |                                          |
| Co-NCNT                              | 2.7                                   | 872.3                                    |                                                 | 1 C             | 0.072%, 700                       | 10.1039/c<br>9cc08218                    |
|                                      | 4.3                                   |                                          | 5.09                                            | 0.1 C           |                                   | b                                        |
| CoP/C                                | 1.4                                   | 938                                      |                                                 | 1 C             | 0.08%, 500                        | 10.1021/a<br>csami.9b1                   |
|                                      | 3.2                                   |                                          | 2.42                                            | 0.5 C           |                                   | 8723                                     |
| Co-N-<br>C/rGO/PP                    | 1-1.2                                 | 865                                      |                                                 | 0.5 C           | 0.057%, 500                       | 10.1016/j.<br>memsci.2<br>017.11.02<br>6 |
| Co/Ti <sub>2</sub> C                 | 1.1                                   | 880                                      |                                                 | 0.2 C           | 0.087%, 400                       | 10.1002/s<br>mll.20220<br>4005           |
| CoOOH-<br>PHCS                       | 5.0                                   | 1040                                     |                                                 | 0.1 C           | 0.485%, 100                       | 10.1016/j.<br>cej.2022.1<br>35790        |
| rGO/a-<br>CoO NSs                    | 2.0                                   | 1248.2                                   |                                                 | 1 c             | 0.033%, 500                       | 10.1038/s<br>41467-<br>021-<br>23349-9   |
| Co <sub>9</sub> S <sub>8</sub> /CoO  | 1                                     | 956                                      |                                                 | 1 C             | 0.065 %, 300 cycles               | 10.1016/j.<br>nanoen.20                  |
|                                      | 2.5                                   | 925                                      |                                                 | 1 C             | 0.049%, 1000 cycles               | 19.03.060                                |
| Co-<br>NiS <sub>2</sub> @CN<br>F-CNT | 1.8                                   | 1218                                     |                                                 | 0.2             | 0.045%, 500 cycles                | 10.1002/a<br>enm.2023<br>00452           |
| S-Z-CoS <sub>2</sub>                 |                                       | 993                                      |                                                 | 0.2 C           | 0.12%, 200 cycles                 | 10.1039/c<br>9ta06947j                   |
|                                      | 2.5-2.9                               |                                          | 3                                               | 0.2 C           |                                   |                                          |

Note 1. The content of Co in the Co@NCNN armor catalyst.

At 800 °C in an air environment, the catalyst undergoes oxidation, resulting in carbon loss and the eventual oxidation of cobalt to  $\text{Co}_3\text{O}_4$  ( $3\text{Co}+2\text{O}_2\rightarrow\text{Co}_3\text{O}_4$ ). The content of Co in the sample can be accurately determined through calculations based on the reaction equation.

Assume that the 1 g sample before heating contains  $x$  g ( $\frac{x}{59}$  mol) of Co. The amount of substance reacting the final  $\text{Co}_3\text{O}_4$  is  $\frac{1}{3}\frac{x}{59}$  mol. According to the TGA curve (Figure 2b), the residual mass of the Co@NCNN-700, Co@NCNN-800, and Co@NCNN-900 are 0.4108, 0.3923 and 0.3583 g, respectively. The Co content before the reaction can be obtained by the following equation:

$$\frac{1}{3}\frac{x}{59} \times (59 \times 3 + 16 \times 4) = 0.4108 \text{ or } 0.3923 \text{ or } 0.3583$$

According to the calculation, the Co content of Co@NCNN-700, Co@NCNN-800, and Co@NCNN-900 are 30.2, 28.8 and 26.3 wt%, respectively.

Note 2. Calculation of lithium-ion diffusion coefficient ( $D_{\text{Li}^+}$ )

Lithium-ion diffusion coefficient ( $D_{\text{Li}^+}$ ) can be calculated according to the Randles-Sevcik equation:

$$I_p = 2.65 \times 10^5 n^{1.5} A D_{\text{Li}^+}^{0.5} C_{\text{Li}^+} v^{0.5}$$

In the equation,  $I_p$  is the peak current (A),  $n$  is the number of transferred electrons ( $n = 2$  in Li-S battery),  $A$  is the electrode area ( $A=1.33 \text{ cm}^2$ ),  $D_{\text{Li}^+}$  is the diffusion rate of  $\text{Li}^+$  ( $\text{cm}^2 \text{ s}^{-1}$ ),  $C_{\text{Li}^+}$  is the concentration of  $\text{Li}^+$  in electrolyte ( $C_{\text{Li}^+} = 1 \text{ mol L}^{-1}$ ), and  $v$  is the scan rate.

The above equation can be obtained by deformation:

$$D_{\text{Li}^+} = \left( \frac{1}{2.65 \times 10^5 \times 2^{1.5} \times 1.33} \times \frac{I_p}{v^{0.5}} \right)^2$$

Thus, the  $D_{\text{Li}^+}$  can be calculated from the linear relationship between the peak current and the square root of the scan rate.
